# Supplementary material
Source: publisher figshare collection journal article supplement (https://asha.figshare.com/ndownloader/files/22129422)
Supplement: Supplementary file 1 [file 22129422]

**Supplemental Material S1.** Results of the multilevel regression models for the three outcome variables without outlier.

| Variable                   | AWC                             |                                | CTC                            |                                | CVC                            |                                |
|----------------------------|---------------------------------|--------------------------------|--------------------------------|--------------------------------|--------------------------------|--------------------------------|
|                            | Unadjusted                      | Adjusted                       | Unadjusted                     | Adjusted                       | Unadjusted                     | Adjusted                       |
| Setting                    |                                 |                                |                                |                                |                                |                                |
| In home                    | [Reference]                     | [Reference]                    | [Reference]                    | [Reference]                    | [Reference]                    | [Reference]                    |
| Childcare (during)         | −11.00 <sup>***</sup><br>(2.19) | −9.86 <sup>***</sup><br>(2.29) | −1.09 <sup>***</sup><br>(0.09) | −1.09 <sup>***</sup><br>(0.09) | −6.44 <sup>***</sup><br>(0.36) | −5.78 <sup>***</sup><br>(0.35) |
| Childcare (before & after) | 11.11 <sup>***</sup><br>(2.21)  | 11.70 <sup>**</sup><br>(2.30)  | 0.69 <sup>***</sup><br>(0.09)  | 0.69 <sup>***</sup><br>(0.09)  | 0.81 <sup>*</sup><br>(0.36)    | 1.16 <sup>*</sup><br>(0.35)    |
| Race                       |                                 |                                |                                |                                |                                |                                |
| Minority                   |                                 | [Reference]                    |                                | [Reference]                    |                                | [Reference]                    |
| White                      |                                 | 7.02<br>(9.34)                 | 0.91 <sup>*</sup><br>(0.39)    | 0.91 <sup>*</sup><br>(0.39)    |                                | 4.91 <sup>*</sup><br>(1.98)    |
| Intercept                  | 18.53<br>(9.83)                 | 30.02<br>(32.09)               | −0.43<br>(1.33)                | −0.43<br>(1.33)                | 1.42<br>(1.53)                 | −13.26 <sup>*</sup><br>(6.41)  |
| BIC                        | 169,036                         | 160,168                        | 73,143                         | 73,143                         | 117,929                        | 13,333                         |
| Observations               | 14,103                          | 13,333                         | 13,333                         | 13,333                         | 14,103                         | 13,719                         |
| Participants               | 38                              | 36                             | 38                             | 36                             | 38                             | 36                             |

\* $p < .05$ . \*\* $p < .01$ . \*\*\* $p < .001$ .

All models controlled for the non-linear effect of the time of day. In addition, adjusted models were adjusted for age, gender, total language score, the number of adults in the home, the number of children in the home, parent education level, and family income. AWC = adult word count; CTC = child turn count; CVC = child vocalization count; BIC = Bayesian information criterion.
